# Supplementary material for: Substituent effects in solution speciation of the mononuclear and dinuclear trimethylplatinum(iv) iodide complexes of pyridines
Source: Royal Society of Chemistry journal article supplement (doi:10.1039/c4nj02426e), 2015-01-01
Supplement: c4nj02426e1.pdf [file c4nj02426e1.pdf]

**Substituent effects in solution speciation of the mononuclear and dinuclear  
trimethylplatinum(IV) iodide complexes of pyridines**

Biswa Nath Ghosh,<sup>a,b,\*</sup> Dieter Lentz<sup>c</sup> and Sabine Schlecht<sup>b</sup>

<sup>a</sup>*Department of Chemistry, Veer Surendra Sai University of Technology, Burla, Sambalpur-768018, Odisha, India. E-Mail address: [b.chem06@gmail.com](mailto:b.chem06@gmail.com), Tel.: +91-8984710201*

<sup>b</sup>*Institut für Anorganische und Analytische Chemie, Justus-Liebig-Universität, Heinrich-Buff-Ring 58, 35392 Giessen, Germany.*

<sup>c</sup>*Institut für Chemie und Biochemie, Anorganische Chemie, Freie Universität Berlin, Fabeckstr. 34-36, D-14195 Berlin, Germany.*

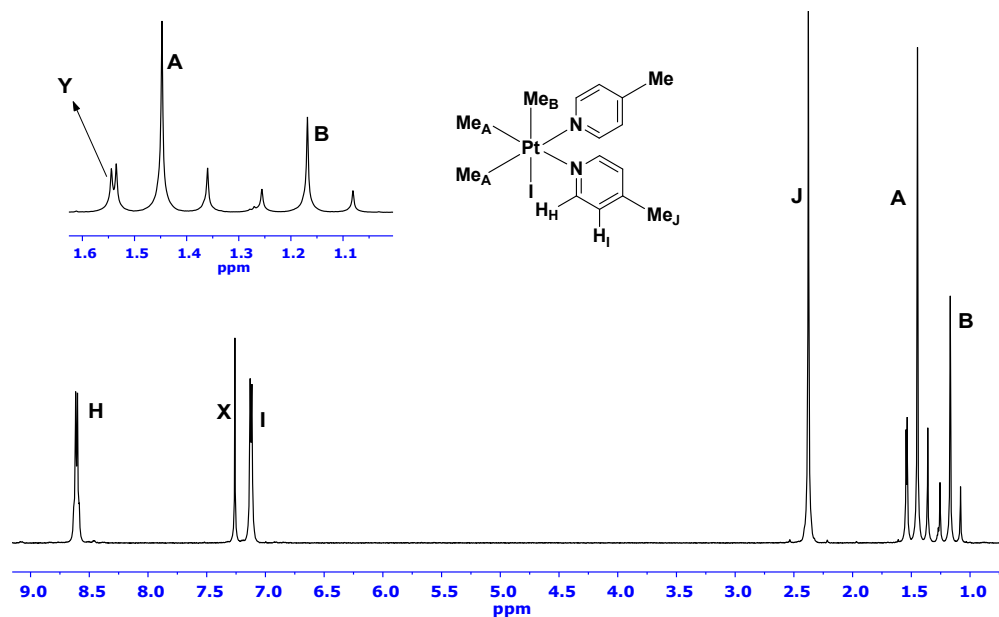

**Fig.S1** The 400 MHz  $^1\text{H}$  NMR spectrum of mononuclear  $[\text{PtMe}_3(4\text{-Mepy})_2\text{I}]$  in  $\text{CDCl}_3$ . X is the solvent peak and Y is the peak for water molecules present in  $\text{CDCl}_3$ . Inset showing the signals for the methyl groups bonded to platinum metal.

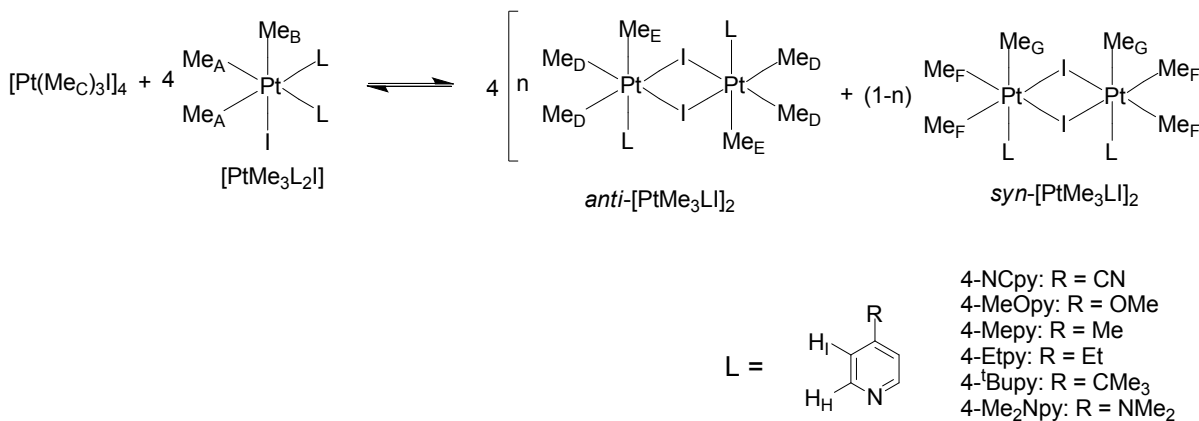

**Scheme S1** The reaction of tetrameric trimethylplatinum(IV) iodide and mononuclear  $[\text{PtMe}_3\text{L}_2\text{I}]$  (L = pyridines) complexes in chloroform showing the labelling.

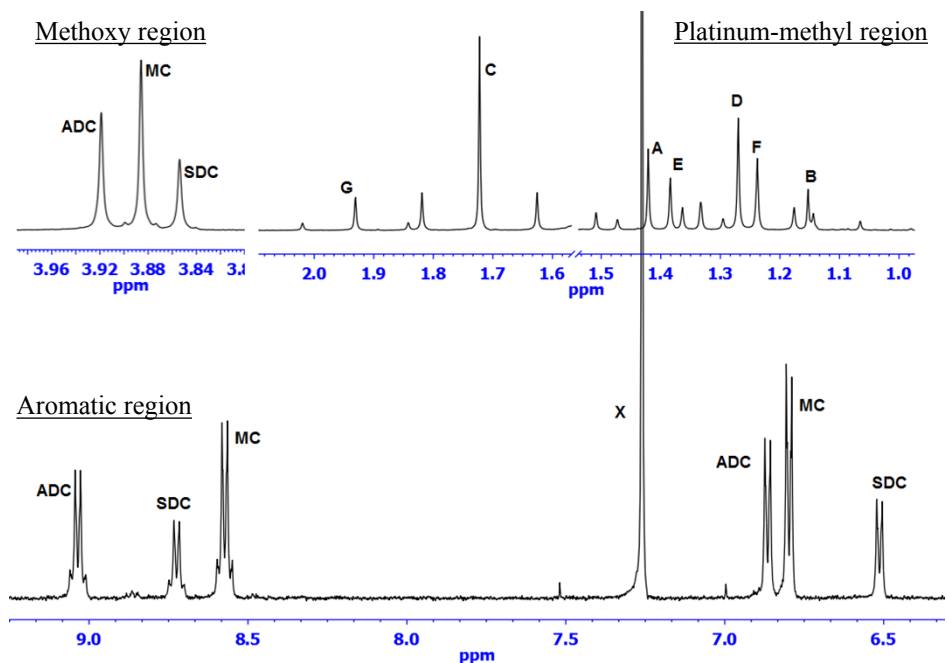

**Fig. S2** 400 MHz  $^1\text{H}$  NMR spectrum of 1:1 mixture of  $[\text{PtMe}_3(4\text{-MeOpy})_2\text{I}]$  and  $[(\text{PtMe}_3\text{I})_4]$  in  $\text{CDCl}_3$ , measured at room temperature. Here ADC = *anti*- $[\text{PtMe}_3(4\text{-MeOpy})\text{I}]_2$ , SDC = *syn*- $[\text{PtMe}_3(4\text{-MeOpy})\text{I}]_2$  and MC = mononuclear  $[\text{PtMe}_3(4\text{-MeOpy})_2\text{I}]$ . X is the solvent peak. Labelling in the platinum-methyl region refers to Scheme S1.

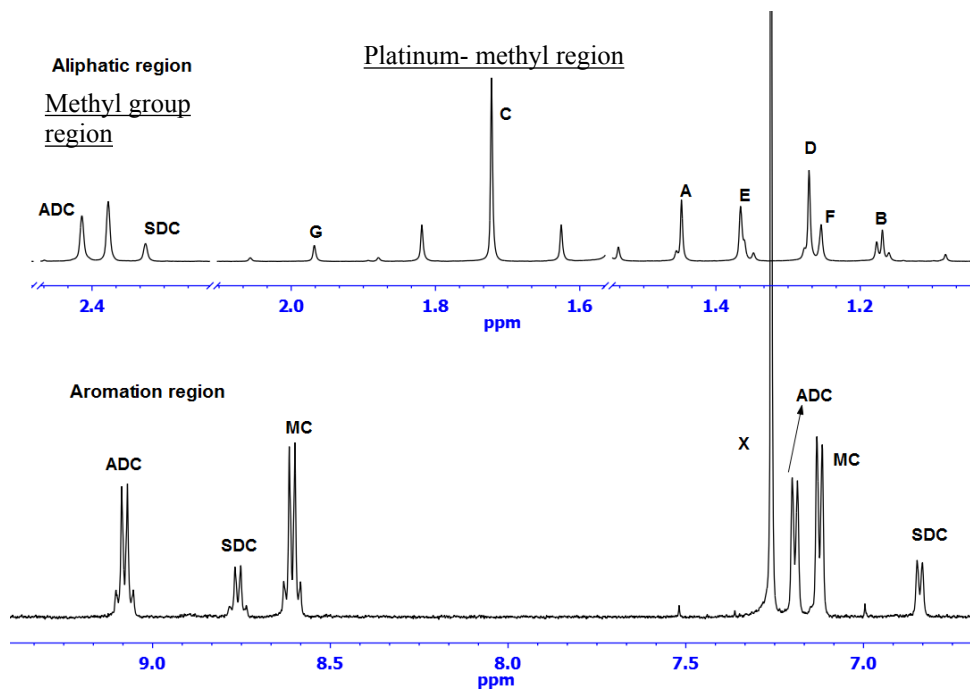

**Fig. S3** 400 MHz  $^1\text{H}$  NMR spectrum of 1:1 mixture of  $[\text{PtMe}_3(4\text{-Mepy})_2\text{I}]$  and  $[(\text{PtMe}_3\text{I})_4]$  in  $\text{CDCl}_3$ , measured at room temperature. Here ADC = *anti*- $[\text{PtMe}_3(4\text{-Mepy})\text{I}]_2$ , SDC = *syn*- $[\text{PtMe}_3(4\text{-Mepy})\text{I}]_2$  and MC = mononuclear  $[\text{PtMe}_3(4\text{-Mepy})_2\text{I}]$ . X is the solvent peak. Labelling of methyl groups in the platinum-methyl region refers to scheme S1.

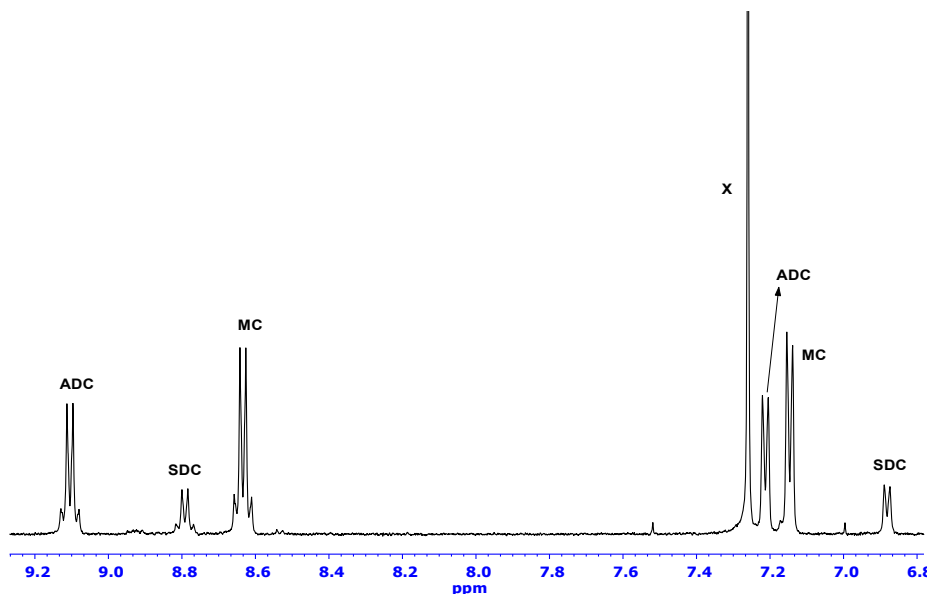

**Fig. S4** Aromatic region in the 400 MHz  $^1\text{H}$  NMR spectrum of 1:1 mixture of  $[\text{PtMe}_3(4\text{-Etpy})_2\text{I}]$  and  $[(\text{PtMe}_3\text{I})_4]$  in  $\text{CDCl}_3$ , measured at room temperature. Here ADC = *anti*- $[\text{PtMe}_3(4\text{-Etpy})\text{I}]_2$ , SDC = *syn*- $[\text{PtMe}_3(4\text{-Etpy})\text{I}]_2$  and MC = mononuclear  $[\text{PtMe}_3(4\text{-Etpy})_2\text{I}]$ . X is the solvent peak.

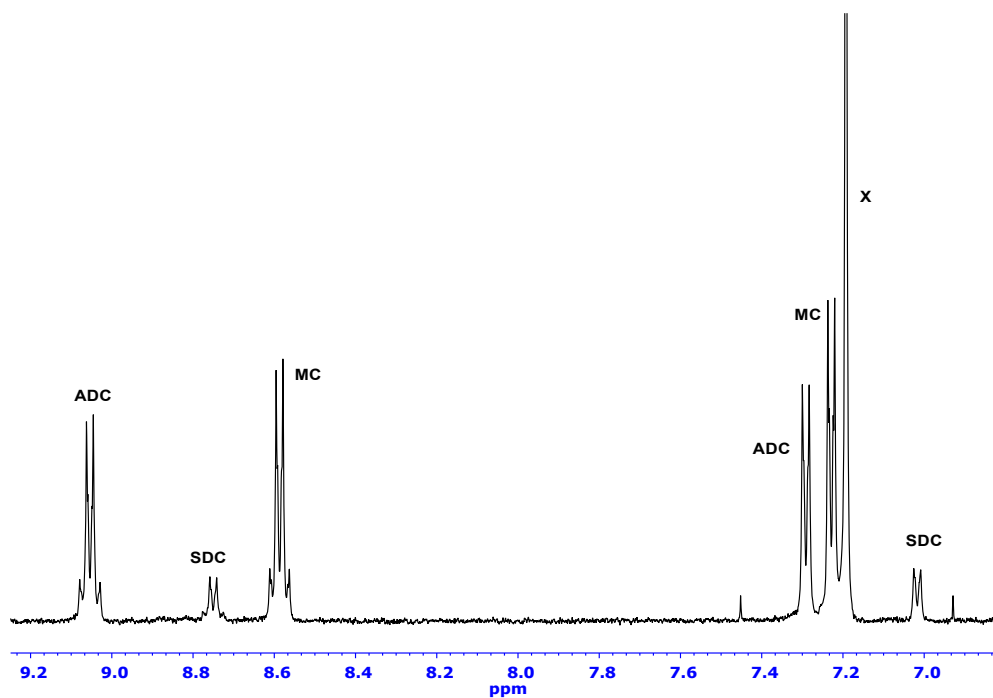

**Fig. S5** Aromatic region in the 400 MHz  $^1\text{H}$  NMR spectrum of 1:1 mixture of  $[\text{PtMe}_3(4\text{-}^i\text{Bupy})_2\text{I}]$  and  $[(\text{PtMe}_3\text{I})_4]$  in  $\text{CDCl}_3$ , measured at room temperature. Here ADC = *anti*- $[\text{PtMe}_3(4\text{-}$

$^t\text{BupyI}]_2$ , SDC = *syn*-[PtMe<sub>3</sub>(4- $^t\text{Bupy}$ )I]<sub>2</sub> and MC = mononuclear [PtMe<sub>3</sub>(4- $^t\text{Bupy}$ )<sub>2</sub>I]. X is the solvent peak.

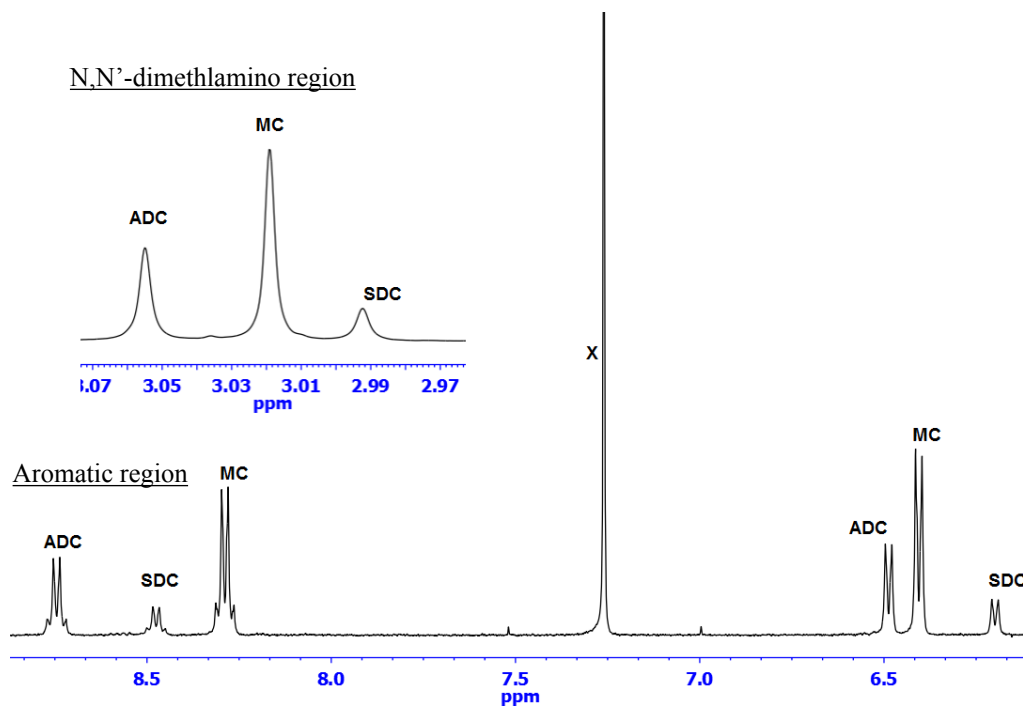

**Fig. S6** 400 MHz <sup>1</sup>H NMR spectrum of 1:1 mixture of [PtMe<sub>3</sub>(4-Me<sub>2</sub>Npy)<sub>2</sub>I] and [(PtMe<sub>3</sub>I)<sub>4</sub>] in CDCl<sub>3</sub>, measured at room temperature. Here ADC = *anti*-[PtMe<sub>3</sub>(4-Me<sub>2</sub>Npy)I]<sub>2</sub>, SDC = *syn*-[PtMe<sub>3</sub>(4-Me<sub>2</sub>Npy)I]<sub>2</sub> and MC = mononuclear [PtMe<sub>3</sub>(4-Me<sub>2</sub>Npy)<sub>2</sub>I]. X is the solvent peak.

**Table S1 <sup>1</sup>H NMR data<sup>a</sup> for the reaction of trimethylplatinum(IV) iodide with mononuclear [PtMe<sub>3</sub>L<sub>2</sub>I] (L= pyridines) complexes in CDCl<sub>3</sub>**

| <b>PtMe<sub>3</sub>L<sub>2</sub>I complex</b>             | <b>Pt(IV) species present in solution</b>                             | <b>δ(Pt-Me)<sup>b, e</sup></b> | <b>Trans ligand</b>       | <b>δ(ligand H)<sup>c, e</sup></b>                                                   |
|-----------------------------------------------------------|-----------------------------------------------------------------------|--------------------------------|---------------------------|-------------------------------------------------------------------------------------|
| [PtMe <sub>3</sub> (4-NCpy) <sub>2</sub> I] <sup>1</sup>  | [PtMe <sub>3</sub> (4-NCpy) <sub>2</sub> I]                           | A 1.53 (71.2)<br>B 1.18 (67.3) | 4-NCpy<br>I               | H 9.04 (6.4) (17.9) <sup>d</sup><br>I 7.64 (6.5)                                    |
|                                                           | PtMe <sub>3</sub> I                                                   | C 1.72 (77.3)                  | I                         | -                                                                                   |
|                                                           | <i>anti</i> -[PtMe <sub>3</sub> (4-NCpy)I] <sub>2</sub>               | D 1.27 (73.9)<br>E 1.41 (72.5) | I<br>4-NCpy               | H 9.47 (6.4) (18.5) <sup>d</sup><br>I 7.67 (6.5)                                    |
|                                                           | <i>syn</i> -[PtMe <sub>3</sub> (4-NCpy)I] <sub>2</sub>                | F 1.25<br>G 2.04 (72.6)        | I<br>4-NCpy               | H 9.18<br>I 7.37                                                                    |
| [PtMe <sub>3</sub> (4-MeOpy) <sub>2</sub> I]              | [PtMe <sub>3</sub> (4-MeOpy) <sub>2</sub> I]                          | A 1.42 (70.0)<br>B 1.15 (70.2) | 4-MeOpy<br>I              | H 8.58 (7.0) (19.0) <sup>d</sup><br>I 6.80 (7.0)<br>OMe 3.89                        |
|                                                           | PtMe <sub>3</sub> I                                                   | C 1.72 (77.3)                  | I                         | -                                                                                   |
|                                                           | <i>anti</i> -[PtMe <sub>3</sub> (4-MeOpy)I] <sub>2</sub>              | D 1.27 (75.1)<br>E 1.38 (71.0) | I<br>4-MeOpy              | H 9.04 (6.9) (19.7) <sup>d</sup><br>I 6.86 (7.0)<br>OMe 3.92                        |
|                                                           | <i>syn</i> -[PtMe <sub>3</sub> (4-MeOpy)I] <sub>2</sub>               | F 1.24 (75.2)<br>G 1.93 (71.0) | I<br>4-MeOpy              | H 8.73 (6.8) (19.5) <sup>d</sup><br>I 6.51 (6.9)<br>OMe 3.85                        |
| [PtMe <sub>3</sub> (4-Mepy) <sub>2</sub> I] <sup>2</sup>  | [PtMe <sub>3</sub> (4-Mepy) <sub>2</sub> I]                           | A 1.45 (70.0)<br>B 1.17 (70.0) | 4-Mepy<br>I               | H 8.61 (6.4) (19.0) <sup>d</sup><br>I 7.12 (6.0)<br>Me 2.38                         |
|                                                           | PtMe <sub>3</sub> I                                                   | C 1.72 (77.3)                  | I                         | -                                                                                   |
|                                                           | <i>anti</i> -[PtMe <sub>3</sub> (4-Mepy)I] <sub>2</sub>               | D 1.27 (75.1)<br>E 1.37 (71.1) | I<br>4-Mepy               | H 9.08 (6.5) (19.6) <sup>d</sup><br>I 7.19 (6.0)<br>Me 2.41                         |
|                                                           | <i>syn</i> -[PtMe <sub>3</sub> (4-Mepy)I] <sub>2</sub>                | F 1.25 (75.1)<br>G 1.97 (71.1) | I<br>4-Mepy               | H 8.76 (6.4) (19.2) <sup>d</sup><br>I 6.84 (5.8)<br>Me 2.33                         |
| [PtMe <sub>3</sub> (4-Etpy) <sub>2</sub> I]               | [PtMe <sub>3</sub> (4-Etpy) <sub>2</sub> I]                           | A 1.45 (70.1)<br>B 1.18 (70.2) | 4-Etpy<br>I               | H 8.64 (6.4) (18.9) <sup>d</sup><br>I 7.15 (6.4)<br>CH <sub>2</sub> 2.68<br>Me 1.27 |
|                                                           | PtMe <sub>3</sub> I                                                   | C 1.72 (77.3)                  | I                         | -                                                                                   |
|                                                           | <i>anti</i> -[PtMe <sub>3</sub> (4-Etpy)I] <sub>2</sub>               | D 1.28 (75.1)<br>E 1.36 (71.0) | I<br>4-Etpy               | H 9.11 (6.6) (19.8) <sup>d</sup><br>I 7.21 (6.3)<br>CH <sub>2</sub> 2.72<br>Me 1.30 |
|                                                           | <i>syn</i> -[PtMe <sub>3</sub> (4-Etpy)I] <sub>2</sub>                | F 1.28 (75.1)<br>G 1.99 (71.1) | I<br>4-Etpy               | H 8.79 (6.5) (19.4) <sup>d</sup><br>I 6.88 (6.1)<br>CH <sub>2</sub> 2.62<br>Me 1.26 |
| [PtMe <sub>3</sub> (4- <sup>t</sup> Bupy) <sub>2</sub> I] | [PtMe <sub>3</sub> (4- <sup>t</sup> Bupy) <sub>2</sub> I]             | A 1.45 (69.9)<br>B 1.19 (70.1) | 4- <sup>t</sup> Bupy<br>I | H 8.66 (6.5) (19.0) <sup>d</sup><br>I 7.30 (6.7)<br><sup>t</sup> Bu 1.33            |
|                                                           | PtMe <sub>3</sub> I                                                   | C 1.72 (77.3)                  | I                         | -                                                                                   |
|                                                           | <i>anti</i> -[PtMe <sub>3</sub> (4- <sup>t</sup> Bupy)I] <sub>2</sub> | D 1.30 (75.1)<br>E 1.35 (70.8) | I<br>4- <sup>t</sup> Bupy | H 9.12 (6.6) (19.8) <sup>d</sup><br>I 7.36 (6.6)<br><sup>t</sup> Bu 1.35            |

|                                                                         |                                                                        |                                |                            |                                                                           |
|-------------------------------------------------------------------------|------------------------------------------------------------------------|--------------------------------|----------------------------|---------------------------------------------------------------------------|
|                                                                         | <i>syn</i> -[PtMe <sub>3</sub> (4- <sup>1</sup> Bupy)I] <sub>2</sub>   | F 1.34 (75.1)<br>G 2.01 (71.2) | I<br>4- <sup>1</sup> Bupy  | H 8.82 (6.6) (19.4) <sup>d</sup><br>I 7.09 (6.4)<br><sup>1</sup> Bu 1.32  |
| [PtMe <sub>3</sub> (4-Me <sub>2</sub> Npy) <sub>2</sub> I] <sup>1</sup> | [PtMe <sub>3</sub> (4-Me <sub>2</sub> Npy) <sub>2</sub> I]             | A 1.35 (69.3)<br>B 1.14 (71.5) | 4-Me <sub>2</sub> Npy<br>I | H 8.29 (7.2) (19.6) <sup>d</sup><br>I 6.40 (7.2)<br>NMe <sub>2</sub> 3.02 |
|                                                                         | PtMe <sub>3</sub> I                                                    | C 1.72 (77.3)                  | I                          | -                                                                         |
|                                                                         | <i>anti</i> -[PtMe <sub>3</sub> (4-Me <sub>2</sub> Npy)I] <sub>2</sub> | D 1.27 (75.6)<br>E 1.39 (70.0) | I<br>4-Me <sub>2</sub> Npy | H 8.74 (7.1) (20.6) <sup>d</sup><br>I 6.49 (7.1)<br>NMe <sub>2</sub> 3.05 |
|                                                                         | <i>syn</i> -[PtMe <sub>3</sub> (4-Me <sub>2</sub> Npy)I] <sub>2</sub>  | F 1.27 (75.6)<br>G 1.90 (70.1) | I<br>4-Me <sub>2</sub> Npy | H 8.48 (7.0) (20.3) <sup>d</sup><br>I 6.20 (7.0)<br>NMe <sub>2</sub> 2.99 |

<sup>a</sup>Chemical shifts quoted in ppm are relative to an internal solvent peak (CDCl<sub>3</sub>, δ 7.26 ppm). <sup>b</sup><sup>2</sup>J<sub>Pt-H</sub>/Hz in parentheses. <sup>c</sup><sup>3</sup>J<sub>H-H</sub>/Hz in parentheses. <sup>d</sup><sup>3</sup>J<sub>Pt-H</sub>/Hz in parentheses. <sup>e</sup> labelling refers to scheme S1. Not all the scalar coupling resolved.

**Table S2 Crystallographic data and structure refinement for mononuclear [PtMe<sub>3</sub>L<sub>2</sub>I] complexes**

| Complex                                         | [PtMe <sub>3</sub> (4-NCpy) <sub>2</sub> I]        | [PtMe <sub>3</sub> (4-Mepy) <sub>2</sub> I]        | [PtMe <sub>3</sub> (4-Etpy) <sub>2</sub> I]        |
|-------------------------------------------------|----------------------------------------------------|----------------------------------------------------|----------------------------------------------------|
| CCDC No.                                        | 1037991                                            | 866046                                             | 823795                                             |
| Empirical formula                               | C <sub>15</sub> H <sub>17</sub> IN <sub>4</sub> Pt | C <sub>15</sub> H <sub>23</sub> IN <sub>2</sub> Pt | C <sub>17</sub> H <sub>27</sub> IN <sub>2</sub> Pt |
| Formula weight                                  | 575.32                                             | 553.34                                             | 581.39                                             |
| <i>T</i> / K                                    | 123(2)                                             | 123(2)                                             | 133(2)                                             |
| $\lambda$ / Å                                   | 0.71073                                            | 0.71073                                            | 0.71073                                            |
| Crystal color, shape                            | colorless, block                                   | colorless, block                                   | yellow, block                                      |
| Crystal size/mm <sup>3</sup>                    | 0.300 x 0.200 x 0.100                              | 0.380x0.140x0.140                                  | 0.410x0.210x0.180                                  |
| Crystal system                                  | Triclinic                                          | monoclinic                                         | monoclinic                                         |
| Space group                                     | <i>P</i> -1                                        | <i>P</i> 2 <sub>1</sub> / <i>n</i>                 | <i>P</i> 2 <sub>1</sub> / <i>c</i>                 |
| <i>a</i> / Å                                    | 9.7124(5)                                          | 11.1252(4)                                         | 12.0156(17)                                        |
| <i>b</i> / Å                                    | 10.2867(5)                                         | 12.8648(5)                                         | 12.0304(17)                                        |
| <i>c</i> / Å                                    | 10.3892(5)                                         | 12.2536(3)                                         | 13.4566(19)                                        |
| $\alpha$ / °                                    | 70.911(3)                                          | 90                                                 | 90.00                                              |
| $\beta$ / °                                     | 66.286(3)                                          | 98.742(2)                                          | 102.370(3)                                         |
| $\gamma$ / °                                    | 73.069(3)                                          | 90                                                 | 90.00                                              |
| <i>V</i> / Å <sup>3</sup>                       | 882.64(8)                                          | 1733.40(10)                                        | 1900.0(5)                                          |
| <i>Z</i>                                        | 2                                                  | 4                                                  | 4                                                  |
| <i>D</i> <sub>calc.</sub> (g cm <sup>-3</sup> ) | 2.165                                              | 2.120                                              | 2.032                                              |
| $\mu$ / mm <sup>-1</sup>                        | 9.696                                              | 9.866                                              | 9.007                                              |
| <i>F</i> (000)                                  | 532                                                | 1032                                               | 1096                                               |
| $\theta$ / °                                    | 2.70 to 25.25                                      | 3.12 to 25.25                                      | 2.29 to 30.58                                      |
| Completeness to $\theta_{\text{full}}$          | 98.9 %                                             | 99.2%                                              | 99.9 %                                             |
| Reflections collected                           | 6324                                               | 10387                                              | 30865                                              |
| Independent reflections                         | 3174 [R(int) = 0.0243]                             | 3119 [R(int) = 0.0281]                             | 5833 [R(int) = 0.0201]                             |
| Absorption correction                           | multi-scan                                         | multi-scan                                         | multi-scan                                         |
| Max. and min. trans.                            | 0.7457, 0.4643                                     | 0.7457, 0.4865                                     | 0.433, 0.238                                       |
| Data/restraints /parameters                     | 3174/0/193                                         | 3119 / 0 / 177                                     | 5833/0/195                                         |
| Goodness-of-fit on <i>F</i> <sup>2</sup>        | 1.049                                              | 1.079                                              | 1.079                                              |
| Final <i>R</i> indices [I > 2 $\sigma$ (I)]     | R1 = 0.0215, wR2 = 0.0508                          | R1 = 0.0189, wR2 = 0.0398                          | R1 = 0.0146, wR2 = 0.0344                          |
| <i>R</i> indices (all data)                     | R1 = 0.0235, wR2 = 0.0514                          | R1 = 0.0220, wR2 = 0.0410                          | R1 = 0.0184, wR2 = 0.0359                          |
| Largest diff. peak and hole/ eÅ <sup>-3</sup>   | 0.936, -1.136                                      | 0.589, -0.514                                      | 0.598, -1.298                                      |



**Table S3 Crystallographic data and structure refinement for dinuclear [PtMe<sub>3</sub>LI]<sub>2</sub> complexes**

| Complex                                                      | <i>syn</i> -[PtMe <sub>3</sub> (4-NCpy)I] <sub>2</sub>                        | <i>anti</i> -[PtMe <sub>3</sub> (4-NCpy)I] <sub>2</sub>                       | <i>syn</i> -[PtMe <sub>3</sub> (4-MeOpy)I] <sub>2</sub>                                      | <i>syn</i> -[PtMe <sub>3</sub> (4-Et <sub>2</sub> py)I] <sub>2</sub>          |
|--------------------------------------------------------------|-------------------------------------------------------------------------------|-------------------------------------------------------------------------------|----------------------------------------------------------------------------------------------|-------------------------------------------------------------------------------|
| CCDC No.                                                     | 1037992                                                                       | 1037993                                                                       | 1037994                                                                                      | 1037995                                                                       |
| Empirical formula                                            | C <sub>18</sub> H <sub>26</sub> I <sub>2</sub> N <sub>4</sub> Pt <sub>2</sub> | C <sub>18</sub> H <sub>26</sub> I <sub>2</sub> N <sub>4</sub> Pt <sub>2</sub> | C <sub>18</sub> H <sub>32</sub> I <sub>2</sub> N <sub>2</sub> O <sub>2</sub> Pt <sub>2</sub> | C <sub>20</sub> H <sub>36</sub> I <sub>2</sub> N <sub>2</sub> Pt <sub>2</sub> |
| Formula weight                                               | 942.41                                                                        | 942.41                                                                        | 952.43                                                                                       | 948.49                                                                        |
| <i>T</i> / K                                                 | 173(2)                                                                        | 173(2)                                                                        | 193(2)                                                                                       | 193(2)                                                                        |
| $\lambda$ / Å                                                | 0.71073                                                                       | 0.71073                                                                       | 0.71073                                                                                      | 0.71073                                                                       |
| Crystal color, shape                                         | pale-yellow, block                                                            | colorless, block                                                              | yellow, block                                                                                | yellow, plate                                                                 |
| Crystal size/mm <sup>3</sup>                                 | 0.450x0.350x0.160                                                             | 0.380x0.240x0.160                                                             | 0.240x0.230x0.180                                                                            | 0.340x0.320x0.160                                                             |
| Crystal system                                               | monoclinic                                                                    | Monoclinic                                                                    | monoclinic                                                                                   | orthorhombic                                                                  |
| Space group                                                  | <i>P</i> 2 <sub>1</sub> / <i>n</i>                                            | <i>P</i> 2 <sub>1</sub> / <i>c</i>                                            | <i>P</i> 2 <sub>1</sub> / <i>n</i>                                                           | <i>P</i> nam                                                                  |
| <i>a</i> / Å                                                 | 8.88211(18)                                                                   | 8.0595(2)                                                                     | 10.4070(9)                                                                                   | 10.7003(10)                                                                   |
| <i>b</i> / Å                                                 | 12.0880(2)                                                                    | 11.2505(3)                                                                    | 11.7649(6)                                                                                   | 12.7871(9)                                                                    |
| <i>c</i> / Å                                                 | 22.6364(5)                                                                    | 13.6434(4)                                                                    | 20.7823(17)                                                                                  | 18.4091(17)                                                                   |
| $\alpha$ / °                                                 | 90                                                                            | 90                                                                            | 90                                                                                           | 90                                                                            |
| $\beta$ / °                                                  | 99.0938(19)                                                                   | 106.090(3)                                                                    | 98.377(10)°                                                                                  | 90                                                                            |
| $\gamma$ / °                                                 | 90                                                                            | 90                                                                            | 90                                                                                           | 90                                                                            |
| <i>V</i> / Å <sup>3</sup>                                    | 2399.86(9)                                                                    | 1188.64(6)                                                                    | 2517.4(3)                                                                                    | 2518.8(4)                                                                     |
| <i>Z</i>                                                     | 4                                                                             | 2                                                                             | 4                                                                                            | 4                                                                             |
| <i>D</i> <sub>calc.</sub> (g cm <sup>-3</sup> )              | 2.608                                                                         | 2.633                                                                         | 2.513                                                                                        | 2.501                                                                         |
| $\mu$ / mm <sup>-1</sup>                                     | 14.228                                                                        | 14.363                                                                        | 13.568                                                                                       | 13.554                                                                        |
| <i>F</i> (000)                                               | 1696                                                                          | 848                                                                           | 1728                                                                                         | 1728                                                                          |
| $\theta$ / °                                                 | 1.92 to 25.00                                                                 | 2.39 to 25.25                                                                 | 2.34 to 25.25                                                                                | 3.33 to 25.00                                                                 |
| Completeness to $\theta_{full}$                              | 99.9 %                                                                        | 99.9 %                                                                        | 99.6 %                                                                                       | 96.2 %                                                                        |
| Reflections collected                                        | 8366                                                                          | 4366                                                                          | 17067                                                                                        | 16248                                                                         |
| Independent reflections                                      | 4241<br>[ <i>R</i> (int) = 0.0335]                                            | 2161<br>[ <i>R</i> (int) = 0.0299]                                            | 4544<br>[ <i>R</i> (int) = 0.0537]                                                           | 2215<br>[ <i>R</i> (int) = 0.0646]                                            |
| Absorption correction                                        | analytical                                                                    | Gussian                                                                       | multi-scan                                                                                   | multi-scan                                                                    |
| Max. and min. trans.                                         | 0.344, 0.147                                                                  | 0.405, 0.159                                                                  | 0.1115, 0.0529                                                                               | 0.1480, 0.0562                                                                |
| Data/restraints /parameters                                  | 4241 / 0 / 241                                                                | 2161 / 0 / 122                                                                | 4544 / 0 / 245                                                                               | 2215 / 0 / 127                                                                |
| Goodness-of-fit on <i>F</i> <sup>2</sup>                     | 1.042                                                                         | 1.064                                                                         | 0.928                                                                                        | 1.050                                                                         |
| Final <i>R</i> indices [ <i>I</i> > 2 $\sigma$ ( <i>I</i> )] | <i>R</i> 1 = 0.0302,<br><i>wR</i> 2 = 0.0649                                  | <i>R</i> 1 = 0.0331,<br><i>wR</i> 2 = 0.0868                                  | <i>R</i> 1 = 0.0232,<br><i>wR</i> 2 = 0.0493                                                 | <i>R</i> 1 = 0.0351,<br><i>wR</i> 2 = 0.0925                                  |
| <i>R</i> indices (all data)                                  | <i>R</i> 1 = 0.0339,<br><i>wR</i> 2 = 0.0669                                  | <i>R</i> 1 = 0.0349,<br><i>wR</i> 2 = 0.0887                                  | <i>R</i> 1 = 0.0334,<br><i>wR</i> 2 = 0.0512                                                 | <i>R</i> 1 = 0.0384,<br><i>wR</i> 2 = 0.0947                                  |
| Largest diff. peak and hole/<br>eÅ <sup>-3</sup>             | 1.431, -1.323                                                                 | 2.079, -1.932                                                                 | 0.844, -0.8777                                                                               | 2.340, -2.403                                                                 |

**Table S4 Selected bond lengths (Å) and angles (°) in mononuclear [PtMe<sub>3</sub>L<sub>2</sub>I] complexes (L = 4-NCpy, 4-Mepy, 4-Etpy)**

| Complex   | [PtMe <sub>3</sub> (4-NCpy) <sub>2</sub> I] | [PtMe <sub>3</sub> (4-Mepy) <sub>2</sub> I] | [PtMe <sub>3</sub> (4-Etpy) <sub>2</sub> I] |
|-----------|---------------------------------------------|---------------------------------------------|---------------------------------------------|
| Pt1-C1    | 2.053(4)                                    | 2.058(4)                                    | 2.053(2)                                    |
| Pt1-C2    | 2.044(5)                                    | 2.055(4)                                    | 2.053(3)                                    |
| Pt1-C3    | 2.077(4)                                    | 2.061(3)                                    | 2.069(3)                                    |
| Pt1-N1    | 2.200(3)                                    | 2.176(3)                                    | 2.175(2)                                    |
| Pt1-N2    | 2.185(4)                                    | 2.186(3)                                    | 2.189(2)                                    |
| Pt1-I1    | 2.7784(3)                                   | 2.7723(3)                                   | 2.7771(4)                                   |
|           |                                             |                                             |                                             |
| N1-Pt1-N2 | 88.57(12)                                   | 89.10(10)                                   | 90.67(6)                                    |
| C1-Pt1-N1 | 178.77(16)                                  | 178.37(15)                                  | 176.89(9)                                   |
| C2-Pt1-N2 | 177.02(15)                                  | 176.97(14)                                  | 178.58(9)                                   |
| C3-Pt1-I3 | 177.99(14)                                  | 177.19(10)                                  | 178.11(7)                                   |

**Table S5 Selected bond lengths (Å) and angles (°) in dinuclear [PtMe<sub>3</sub>LI]<sub>2</sub> complexes**

| <i>anti</i> -[PtMe <sub>3</sub> (4-NCpy)I] <sub>2</sub> |           |             |          |
|---------------------------------------------------------|-----------|-------------|----------|
| Pt1-C1                                                  | 2.047(9)  | C1-Pt1-N1   | 178.9(3) |
| Pt1-C2                                                  | 2.056(9)  | C2-Pt1-I1   | 179.0(2) |
| Pt1-C3                                                  | 2.057(9)  | C3-Pt1-I1   | 177.2(3) |
| Pt1-N1                                                  | 2.210(6)  | Pt1-I1-Pt1a | 92.46(2) |
| Pt1-I1                                                  | 2.7956(6) | I1-Pt1-I1a  | 87.54(2) |
| <i>syn</i> -[PtMe <sub>3</sub> (4-NCpy)I] <sub>2</sub>  |           |             |          |
| Pt1-C1                                                  | 2.029(7)  | C1-Pt1-N1   | 179.1(2) |
| Pt1-C2                                                  | 2.045(7)  | C2-Pt1-I2   | 178.3(2) |
| Pt1-C3                                                  | 2.041(6)  | C3-Pt1-I1   | 178.6(2) |
| Pt2-C4                                                  | 2.043(7)  | C4-Pt2-N4   | 177.5(2) |
| Pt2-C5                                                  | 2.051(6)  | C5-Pt2-I2   | 177.3(2) |
| Pt2-C6                                                  | 2.043(7)  | C6-Pt2-I1   | 179.6(2) |
| Pt1-N1                                                  | 2.197(6)  | Pt1-I1-Pt2  | 92.89(2) |
| Pt2-N2                                                  | 2.210(6)  | Pt1-I1-Pt2  | 93.06(2) |
| Pt1-I1                                                  | 2.7916(5) | I1-Pt1-I2   | 86.67(2) |
| Pt1-I2                                                  | 2.7927(5) | I1-Pt2-I2   | 86.89(2) |
| Pt2-I1                                                  | 2.7908(5) |             |          |
| Pt2-I2                                                  | 2.7818(5) |             |          |
| <i>syn</i> -[PtMe <sub>3</sub> (4-MeOpy)I] <sub>2</sub> |           |             |          |
| Pt1-C1                                                  | 2.053(8)  | C1-Pt1-N1   | 177.0(3) |
| Pt1-C2                                                  | 2.054(8)  | C2-Pt1-I1   | 179.6(3) |
| Pt1-C3                                                  | 2.044(7)  | C3-Pt1-I2   | 176.8(3) |

|                                                           |           |             |          |
|-----------------------------------------------------------|-----------|-------------|----------|
| Pt2-C4                                                    | 2.047(9)  | C4-Pt2-N2   | 177.2(3) |
| Pt2-C5                                                    | 2.036(9)  | C5-Pt2-I2   | 178.5(3) |
| Pt2-C6                                                    | 2.029(8)  | C6-Pt2-I1   | 177.7(3) |
| Pt1-N1                                                    | 2.188(6)  | Pt1-I1-Pt2  | 93.16(2) |
| Pt2-N2                                                    | 2.181(6)  | Pt1-I1-Pt2  | 92.64(2) |
| Pt1-I1                                                    | 2.7839(5) | I1-Pt1-I2   | 86.92(2) |
| Pt1-I2                                                    | 2.8116(5) | I1-Pt2-I2   | 86.82(2) |
| Pt2-I1                                                    | 2.8020(5) |             |          |
| Pt2-I2                                                    | 2.7987(5) |             |          |
| <b><i>syn</i>-[PtMe<sub>3</sub>(4-Etpy)I]<sub>2</sub></b> |           |             |          |
| Pt1-C1                                                    | 2.054(8)  | C1-Pt1-N1   | 178.3(3) |
| Pt1-C2                                                    | 2.034(9)  | C2-Pt1-I2   | 178.1(3) |
| Pt1-C3                                                    | 2.061(9)  | C3-Pt1-I1   | 178.4(2) |
| Pt1-N1                                                    | 2.189(5)  | Pt1-I1-Pt1a | 92.00(2) |
| Pt1-I1                                                    | 2.7785(6) | Pt1-I2-Pt1a | 93.64(2) |
| Pt1-I2                                                    | 2.8166(6) | I1-Pt1-I2   | 86.81(1) |

## References

1. B. N. Ghosh, H. Hausmann, M. Serafin, D. Lentz and S. Schlecht, *Z. Anorg. Allg. Chem.*, 2013, **639**, 2202-2208.
2. D. E. Clegg, J. R. Hall and G. A. Swile, *J. Organomet. Chem.*, 1972, **38**, 403-420.
